# Supplementary material for: An enantioenriched vanadium phosphonate generated via asymmetric chiral amplification of crystallization from achiral sources showing a single-crystal-to-single-crystal dehydration process
Source: Royal Society of Chemistry journal article supplement (doi:10.1039/c2cc32214e), 2012-01-01
Supplement: c2cc32214e.pdf [file c2cc32214e.pdf]

## SUPPORTING INFORMATION

### **An enantioenriched vanadium phosphonate generated *via* asymmetric chiral amplification of crystallization from achiral sources showing a single-crystal-to-single-crystal dehydration process**

Xiao-Jing Yang, Song-Song Bao, Tao Zheng, Li-Min Zheng\*

State Key Laboratory of Coordination Chemistry, School of Chemistry and Chemical Engineering, Nanjing University, Nanjing 210093, People's Republic of China

\* To whom correspondence should be addressed. E-mail: [lmzheng@nju.edu.cn](mailto:lmzheng@nju.edu.cn).

#### **Experimental Section.**

The reagents and solvents employed were commercially available and used without further purification. The 2-carboxyphenylphosphonic acid (2-cppH<sub>3</sub>) was synthesized by the Arbuzov reaction.<sup>1</sup> Elemental analyses for C, H were performed on an Elementar Vario MICRO elemental analyzer. The infrared spectra were recorded on a Bruker VECTOR 22 IR spectrometer with pressed KBr pellets in the 400–4000 cm<sup>-1</sup> region. Thermogravimetric analyses were performed with a METTLER TOLEDO TGA/DSC 1 instrument in the range of 30–800 °C under a nitrogen flow at a heating rate of 10 °C min<sup>-1</sup>. Powder X-ray diffraction patterns were recorded on a SHIMADZU XRD-6000 instrument using Cu-K $\alpha$  radiation. The magnetic susceptibility data were obtained on polycrystalline samples using a Quantum Design MPMSXL7 SQUID magnetometer. The data were corrected for the diamagnetic contributions of both the sample holder and the compound obtained from Pascal's constants.<sup>2</sup>

#### **Synthesis of (VO)<sub>3</sub>(2-cpp)<sub>2</sub>(H<sub>2</sub>O)<sub>6</sub>·H<sub>2</sub>O (1)**

NH<sub>4</sub>VO<sub>3</sub> ( 0.0232 g, 0.2 mmol ) and 2-cppH<sub>3</sub> ( 0.0404 g, 0.2 mmol) were added to 8 mL 1:1 mixed solution of H<sub>2</sub>O / ethanol, the pH value was adjusted to 0.9 with 1 M HNO<sub>3</sub>. Then the mixture was transferred to a Teflon-lined autoclave and kept at 120 °C for 48 h. After slow cooling to room temperature, blue plate-like crystals were

obtained as a monophasic material based on the powder XRD measurement. The crystals were washed with distilled water and dried in air, then used for physical measurements. Yield: 0.0300 g (62% based on V). Elemental anal. calcd. for  $C_{14}H_{22}O_{20}P_2V_3$ : C, 23.17; H, 3.03. Found: C, 22.94; H, 3.12 %. IR (KBr,  $cm^{-1}$ ): 3228.9(br,s), 1578.1(s), 1546.8(vs), 1471.5(m), 1447.3(m), 1396.7(s), 1264.0(w), 1153.4(s), 1127.1(vs), 1091.2(s), 1053.8(vs), 1023.5(s), 1004.1(s), 872.8(w), 803.1(w), 756.4(m), 720.3(w), 664.1(w), 620.1(m), 561.3(w), 483.8(m).

### Single-Crystal Structure Determination.

Single crystals were selected for indexing and intensity data collection on a Bruker SMART APEX CCD diffractometer using graphite-monochromatized Mo  $K\alpha$  radiation ( $\lambda = 0.71073 \text{ \AA}$ ) at room temperature. A hemisphere of data were collected in the  $\theta$  range  $2.15\text{--}25.00^\circ$  for **1**,  $2.66\text{--}25.00^\circ$  for **1a**, using a narrow-frame method with scan widths of  $0.30^\circ$  in  $\omega$  and an exposure time of 5 s/frame. The data were integrated using the Siemens SAINT program,<sup>3</sup> with the intensities corrected for Lorentz factor, polarization, air absorption, and absorption due to variation in the path length through the detector face plate. Absorption corrections were applied. The structures were solved by direct methods and refined on  $F^2$  by full-matrix least-squares using SHELXTL.<sup>4</sup> All the non-hydrogen atoms were located from the Fourier maps, and were refined anisotropically. All H atoms were allowed for as riding atoms with isotropic vibration parameters related to the non-hydrogen atoms to which they are bonded. The selected bond lengths and angles for the two compounds are listed in Tables S2 and S3.

### References

- 1 I. P. Beletskaya and M. A. Kazankova, *Russian J. Org. Chem.*, 2002, **38**, 1391-1430.
- 2 O. Kahn, *Molecular Magnetism*, VCH Publishers, Inc., New York, **1993**.
- 3 *SAINT, Program for Data Extraction and Reduction*, Siemens Analytical. X-ray Instruments, Madison, WI, 1994–1996.
- 4 *SHELXTL (version 5.0), Reference Manual*, Siemens Industrial Automation. Analytical Instruments, Madison, WI, 1995.

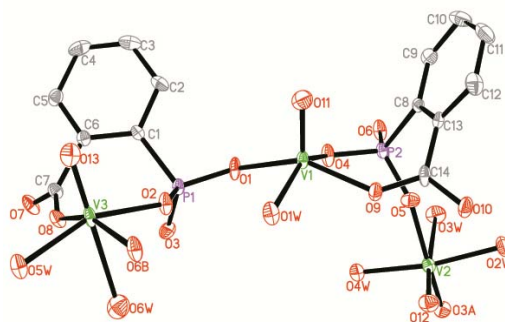

**Fig. S1.** The building unit of **1** in ORTEP view (50% thermal ellipsoids). All H atoms and lattice water molecules are omitted for clarity. Symmetry transformations used to generate equivalent atoms: (A)  $-x+1, y-1/2, -z+2$ ; (B)  $x+1, y, z$ .

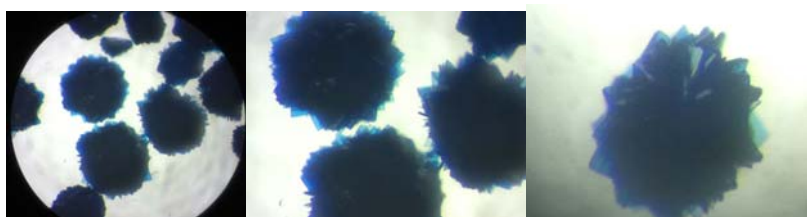

**Fig. S2.** Photographs of crystals of **1** in the form of cluster.

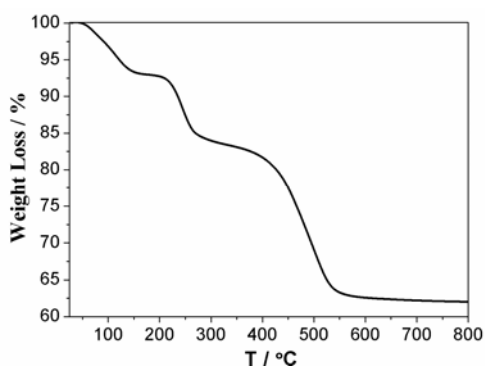

**Fig. S3.** TG curve of compound **1**

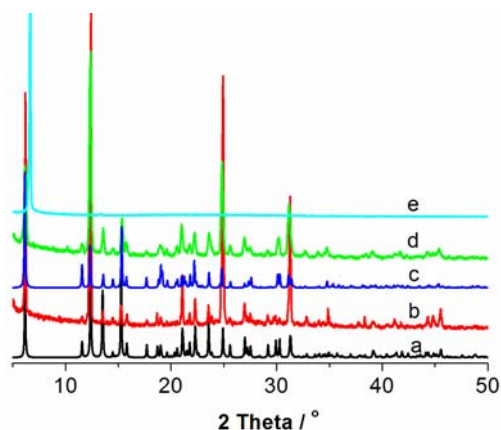

**Fig. S4.** Powder X-ray diffraction patterns for **1**, **1a** and **1b**: (a) calculated from single-crystal data for **1**, (b) bulk sample of **1**, (c) calculated from single-crystal data for **1a**, (d) bulk sample of **1a** obtained by heating **1** at 160 °C for 2 h, (e) bulk sample of **1b** by heating **1** at 270 °C for 2 h.

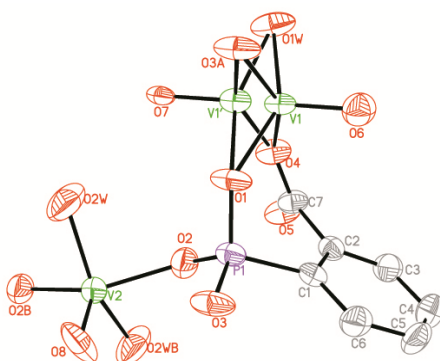

**Fig. S5.** The building unit of **1a** in ORTEP view (50% thermal ellipsoids). All H atoms are omitted for clarity. Symmetry transformations used to generate equivalent atoms: (A)  $x, -y+5/2, z+1/2$ ; (B)  $-x+1, -y+2, -z$ .

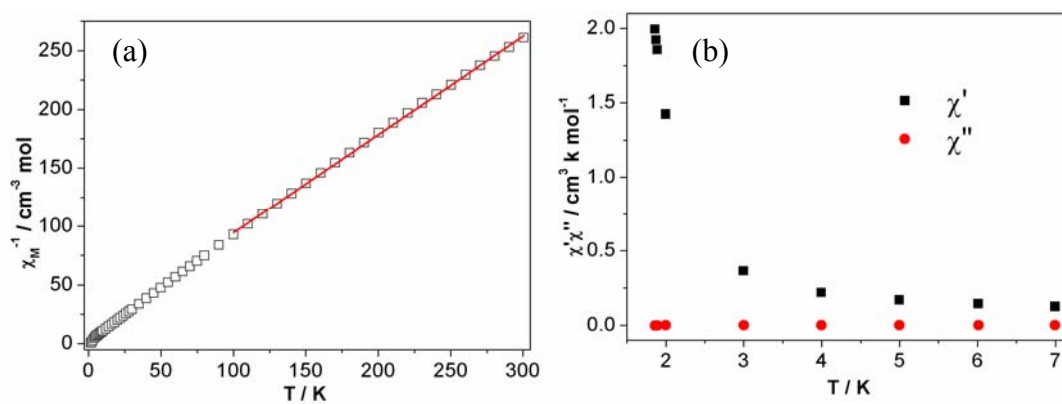

**Fig. S6.** (a)  $\chi_M^{-1}$  vs.  $T$  plot and (b) temperature dependent  $ac$  magnetic susceptibility for **1**.

**Table S1.** Selected bond lengths [Å] and angles [deg] for compound **1**.

|            |            |            |            |
|------------|------------|------------|------------|
| V1-O1      | 1.961(4)   | V3-O6B     | 1.976(4)   |
| V1-O4      | 1.959(4)   | V3-O13     | 1.570(4)   |
| V1-O9      | 1.993(4)   | V3-O8      | 2.005(4)   |
| V1-O11     | 1.570(4)   | V3-O5W     | 2.043(4)   |
| V1-O1W     | 2.030(4)   | V3-O6W     | 2.407(5)   |
| V2-O3A     | 1.956(3)   | P1-O1      | 1.499(4)   |
| V2-O5      | 1.967(4)   | P1-O3      | 1.508(4)   |
| V2-O12     | 1.578(4)   | P1-O2      | 1.533(4)   |
| V2-O2W     | 2.033(4)   | P2-O5      | 1.501(4)   |
| V2-O3W     | 2.272(4)   | P2-O6      | 1.522(4)   |
| V2-O4W     | 2.046(5)   | P2-O4      | 1.527(4)   |
| V3-O2      | 1.973(4)   |            |            |
| O11-V1-O4  | 108.9(2)   | O12-V2-O3W | 174.7(2)   |
| O11-V1-O1  | 106.4(2)   | O5-V2-O3W  | 79.52(16)  |
| O4-V1-O1   | 82.32(17)  | O2W-V2-O3W | 78.8(2)    |
| O11-V1-O9  | 104.6(2)   | O4W-V2-O3W | 85.90(19)  |
| O4-V1-O9   | 88.68(17)  | O13-V3-O2  | 103.5(2)   |
| O1-V1-O9   | 148.95(17) | O13-V3-O8  | 101.0(2)   |
| O11-V1-O1W | 106.7(2)   | O2-V3-O8   | 91.33(16)  |
| O4-V1-O1W  | 144.32(19) | O13-V3-O5W | 100.0(2)   |
| O1-V1-O1W  | 85.96(18)  | O2-V3-O5W  | 156.23(18) |
| O9-V1-O1W  | 84.26(17)  | O8-V3-O5W  | 87.47(16)  |
| O12-V2-O5  | 100.38(19) | O13-V3-O6W | 177.6(2)   |
| O12-V2-O2W | 95.9(2)    | O2-V3-O6W  | 75.88(17)  |
| O5-V2-O2W  | 89.18(18)  | O8-V3-O6W  | 76.73(17)  |
| O12-V2-O4W | 99.4(2)    | O5W-V3-O6W | 80.75(17)  |
| O5-V2-O4W  | 88.95(18)  | O6B-V3-O6W | 79.34(18)  |
| O3A-V2-O5  | 156.57(18) | O6B-V3-O5W | 87.63(16)  |
| O3A-V2-O2W | 91.20(18)  | O6B-V3-O8  | 156.04(17) |
| O3A-V2-O4W | 84.55(18)  | O2-V3-O6B  | 83.88(16)  |
| O3A-V2-O3W | 77.57(16)  | O13-V3-O6B | 102.9(2)   |
| O2W-V2-O4W | 164.7(2)   |            |            |

Symmetry transformations used to generate equivalent atoms: (A)  $-x+1, y-1/2, -z+2$ ;  
(B)  $x+1, y, z$ ; (C)  $-x+1, y+1/2, -z+2$ ; (D)  $x-1, y, z$ .

**Table S2.** Selected bond lengths [Å] and angles [deg] for **1a**.

|            |           |             |            |
|------------|-----------|-------------|------------|
| V1-O6      | 1.576(5)  | V1'-O1W     | 1.932(9)   |
| V1-O3A     | 1.947(4)  | V1'-O1      | 1.944(8)   |
| V1-O1      | 1.959(4)  | V1'-O3A     | 1.984(8)   |
| V1-O4      | 1.982(4)  | V2-O8       | 1.508(9)   |
| V1-O1W     | 1.997(4)  | V2-O2       | 1.940(5)   |
| V1'-O7     | 1.653(17) | V2-O2W      | 1.941(5)   |
| V1'-O4     | 1.928(8)  |             |            |
|            |           |             |            |
| O6-V1-O3A  | 105.5(2)  | O1W-V1'-O1  | 156.1(5)   |
| O6-V1-O1   | 107.9(2)  | O7-V1'-O3A  | 107.9(9)   |
| O3A-V1-O1  | 82.40(18) | O4-V1'-O3A  | 152.9(5)   |
| O6-V1-O4   | 103.6(2)  | O1W-V1'-O3A | 87.1(3)    |
| O3A-V1-O4  | 150.9(2)  | O1-V1'-O3A  | 81.8(3)    |
| O1-V1-O4   | 88.39(19) | O8-V2-O2    | 106.0(4)   |
| O6-V1-O1W  | 105.2(2)  | O8-V2-O2W   | 113.2(5)   |
| O3A-V1-O1W | 86.30(17) | O2-V2-O2W   | 88.9(2)    |
| O1-V1-O1W  | 146.8(2)  | O8-V2-O2B   | 107.0(4)   |
| O4-V1-O1W  | 86.53(18) | O2-V2-O2B   | 146.29(13) |
| O7-V1'-O4  | 99.2(9)   | O2W-V2-O2B  | 84.3(2)    |
| O7-V1'-O1W | 99.5(9)   | O8-V2-O2WB  | 99.8(5)    |
| O4-V1'-O1W | 89.9(4)   | O2-V2-O2WB  | 82.4(2)    |
| O7-V1'-O1  | 104.0(9)  | O2W-V2-O2WB | 147.03(14) |
| O4-V1'-O1  | 90.4(3)   | O2B-V2-O2WB | 85.7(2)    |

Symmetry transformations used to generate equivalent atoms: (A)  $x, -y+5/2, z+1/2$ ;  
 (B)  $-x+1, -y+2, -z$ ; (C)  $x, -y+5/2, z-1/2$ .

**Table S3.** Valence sum calculations for the crystallographically independent vanadium atoms in compound **1**.

|                  | bond-valence sums |              |              |
|------------------|-------------------|--------------|--------------|
|                  | V(1)              | V(2)         | V(3)         |
| V <sup>III</sup> | 3.836             | 3.645        | 3.842        |
| V <sup>IV</sup>  | <b>4.286</b>      | <b>4.072</b> | <b>4.293</b> |
| V <sup>V</sup>   | 4.511             | 4.287        | 4.520        |

**Table S5.** A summary of structure determinations of 6 randomly selected crystals of compound **1** from the same cluster

| Crystals        | Cluster 1      |                |                |                |                 |                |
|-----------------|----------------|----------------|----------------|----------------|-----------------|----------------|
|                 | 1-a            | 1-b            | 1-c            | 1-d            | 1-e             | 1-f            |
| <i>a</i>        | 9.543(3)       | 9.530(3)       | 9.5238(8)      | 9.550(2)       | 9.555(1)        | 9.438(4)       |
| <i>b</i>        | 8.970(3)       | 9.056(3)       | 9.0820(8)      | 9.006(2)       | 8.988(1)        | 8.911(4)       |
| <i>c</i>        | 14.288(5)      | 14.429(5)      | 14.392(1)      | 14.342(3)      | 14.317(2)       | 14.144(6)      |
| $\beta$         | 95.920(6)      | 96.100(7)      | 96.135(2)      | 95.901(5)      | 95.980(2)       | 95.783(7)      |
| <i>V</i>        | 1216.5(7)      | 1238.3(7)      | 1237.7(2)      | 1226.9(5)      | 1223.0(2)       | 1183.4(9)      |
| $R_1$           | 0.0473         | 0.0869         | 0.1417         | 0.0585         | 0.0369          | 0.078          |
| $wR_2$          | 0.1166         | 0.2361         | 0.3732         | 0.1432         | 0.1044          | 0.2007         |
| Flack parameter | <b>0.29(3)</b> | <b>0.35(7)</b> | <b>0.02(8)</b> | <b>0.44(8)</b> | <b>-0.02(2)</b> | <b>0.53(8)</b> |
| Residue peak    | 1.128          | 3.281          | 5.665          | 1.437          | 1.084           | 1.501          |
